# Supplementary material for: A single methyltransferase YefA (RlmCD) catalyses both m5U747 and m5U1939 modifications in Bacillus subtilis 23S rRNA
Source: PubMed Central journal article supplement — Nucleic Acids Res. 2011 Aug 8;39(21):9368–75. doi: 10.1093/nar/gkr626 (PMC3241648; doi:10.1093/nar/gkr626), 2011-08-08
Supplement: supp_gkr626_Supplementary_Data.pdf [file supp_gkr626_Supplementary_Data.pdf]

## Supplementary Figures

### **A single methyltransferase YefA (RlmCD) catalyzes both m<sup>5</sup>U747 and m<sup>5</sup>U1939 modifications in *Bacillus subtilis* 23S rRNA**

**Benoit Desmolaize, Céline Fabret, Damien Brégeon, Simon Rose, Henri Grosjean and Stephen Douthwaite**

#### **Figure S1: MALDI tandem mass spectrum of *B. subtilis* 23S rRNA fragment containing m<sup>5</sup>U747**

Analysis of this nucleotide was facilitated by generating partial RNase T1 digestion products from the G725 to G772 region in wild-type rRNA. The partial RNase T1 product CACGUUG>p corresponds to nucleotides 742 to 748 (box) and contains m<sup>5</sup>U747. This fragment had an initial mass of 2256.3 *m/z* (MH<sup>+</sup>). Generation of the ion pattern after further fragmentation by tandem MS is illustrated; the ions are annotated according to McLuckey et al 1992.

#### **Figure S2: MALDI tandem mass spectrum of *B. subtilis* 23S rRNA fragment containing m<sup>5</sup>U1939**

This nucleotide was analysed after generation of partial RNase A digestion products from the C1914 to C1961 region in wild-type rRNA. The partial RNase A product GAAAUU>p corresponds to nucleotides 1935 to 1940 (box) and contains m<sup>5</sup>U1939. This fragment had an initial mass of 1959.3 *m/z* (MH<sup>+</sup>). The ion fragmentation pattern is annotated as in Fig. S1.

#### **Figure S3: Amino acid sequence alignment of the m<sup>5</sup>U methyltransferase YefA and its *B. subtilis* paralog YfjO**

Identical amino acids are highlighted in black. Both proteins possess the N-terminal extension seen in RlmD and missing in RlmC.

**Figure S4: LC-MS<sup>n</sup> analysis of the m<sup>5</sup>U ribonucleoside from *B. subtilis* tRNAs**

(A) MS of the intact negatively charged m<sup>5</sup>U nucleoside at  $m/z$  257, which upon MS<sup>2</sup> fragmentation (B) yielding ions of  $m/z$  124, 125, 167 and 214. (C) Further fragmentation of the  $m/z$  214 ion (MS<sup>3</sup>) produced ions of  $m/z$  80 and 96. The structures of the main ions produced are shown, and their fragmentation pattern is unambiguously consistent with the initial uridine at  $m/z$  257 being methylated on its C-5 atom.

**Figure S5: HPLC profiles of tRNA nucleosides**

(A) The digestion products of total tRNAs from the wild-type *B. subtilis* strain 168, highlighting the unmodified nucleosides. (B) Enlargement of the boxed region containing the m<sup>5</sup>U modification. Enlargements of the same region for tRNA nucleosides from (C) *B. subtilis*  $\Delta yefA$ , (D) *B. subtilis*  $\Delta yffO$ , (E) *E. coli* wild-type cells, (F) *E. coli* strain  $\Delta rlmC/\Delta rlmD/\Delta trmA$ . (G) Nucleoside standardization mixture that includes m<sup>5</sup>U; the fraction corresponding to the retention time for m<sup>5</sup>U is indicated.

**Reference:**

McLuckey, S. A., Van Berkel, G. J., and Glish, G. L. (1992) Tandem mass spectrometry of small multiply charged oligonucleotides, *J Am Soc Mass Spectrom* **3**, 60-70.

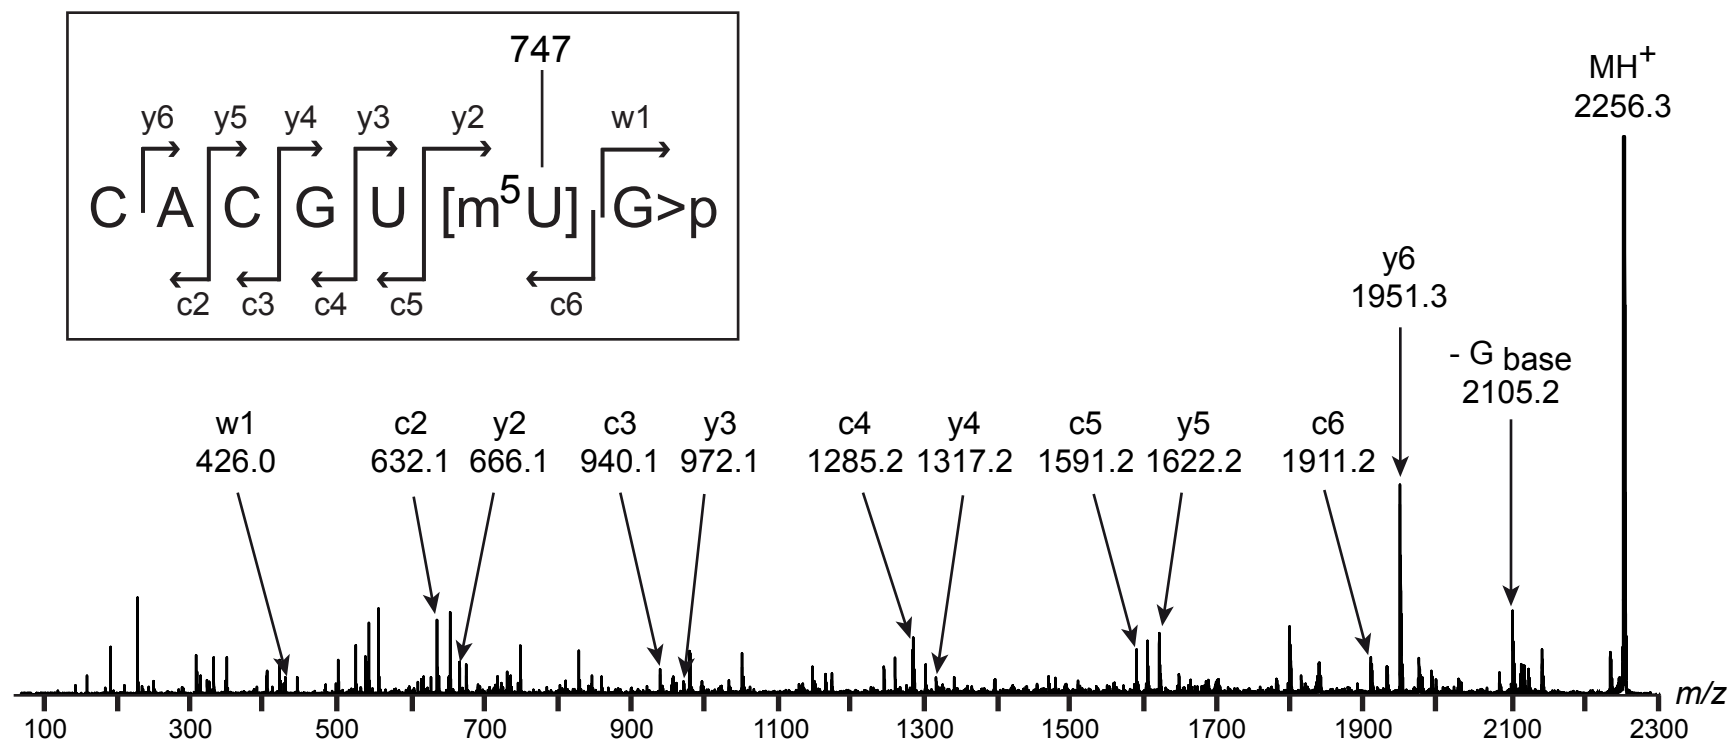

**Figure S1**

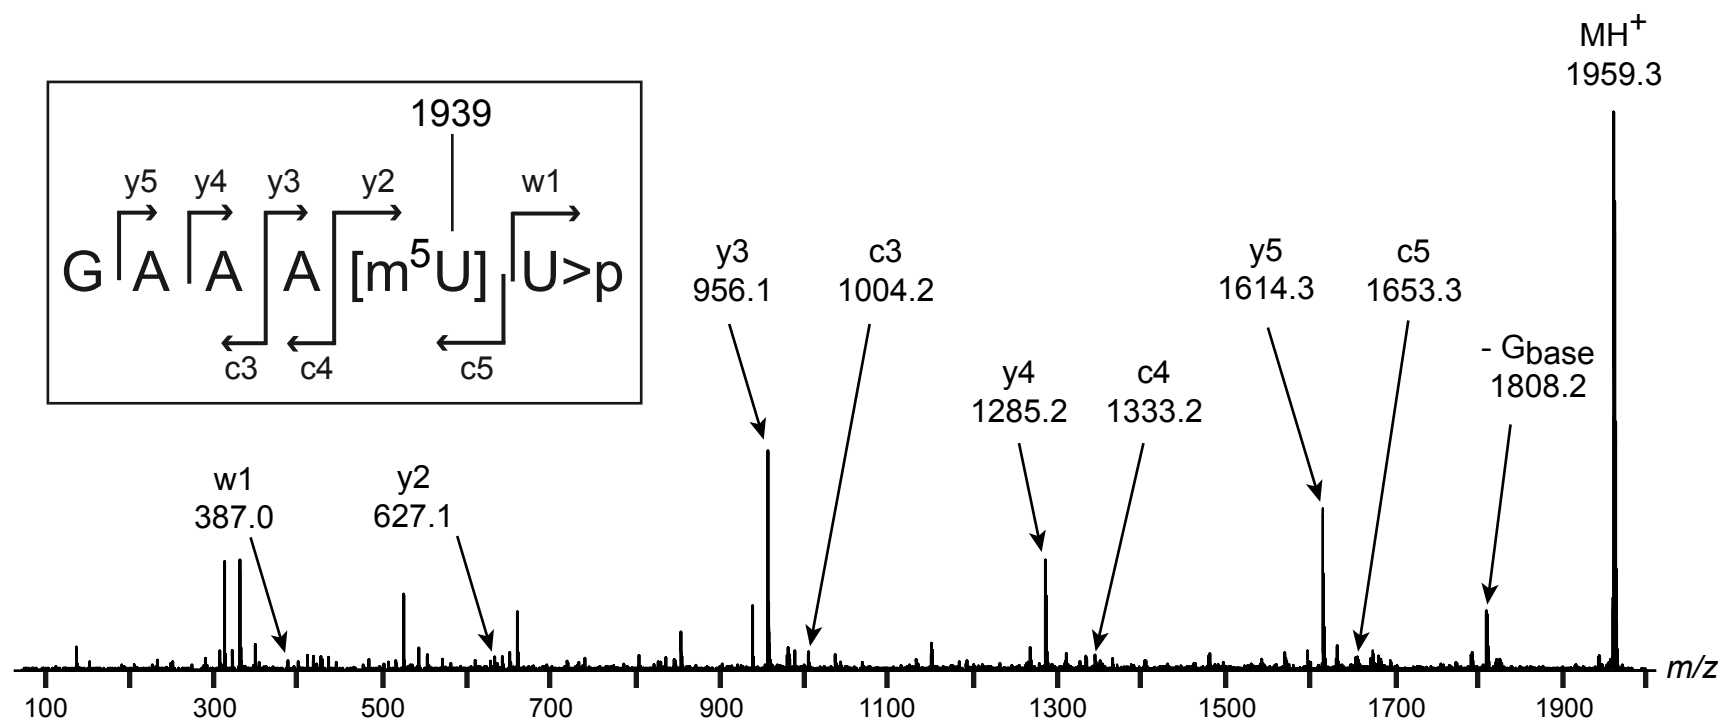

Figure S2

YefA/ ---MKMKPPVEKN--EYYDVTIFEDLTHEGACVAKVQGFPFVFPNALPEEKAQIKVTRVKK  
 YfjO/ MNQQKKQAPVELKVGQTFPLTIKRLGINGEGVGYFKKKVVFVPGALPGEEVVVQATKVQP

YefA/ GFAFGRLIELKEESPHRITDAPCPITYKQCGGCQLQHMTYEGQLLFKQKQVKDVLERIGKLD  
 YfjO/ KFSEGRIRKIRKASEHRVAPPCEVYEQCGGCQLQHILAYSQQLREKRDIVIQSLERHTKFK

YefA/ LSKVTVHPTILGMEDPWNYNRKAQVPVG-EREGLVAGFYQQRSHDIIDMSACLIQQSKND  
 YfjO/ VENMEIKETILGMDNPWNYNRKSQFQIGRSQSCSIIAGLYGLDSHDIVPIKDCIVQHPATN

YefA/ EAVQAVKDIICANYGVKAYNEERHKGWLRRHIMVRYGVVTGEMMIVFITRTSDFPHKAKIIE  
 YfjO/ KTTGIVRRILEDFNVSVYNRKRKRGDVRTIVTRVGFETGEVQVVLVTAKETLPHKEEIVK

YefA/ DITAQFPHVKSIVQINPNKTNVIFGNETNVIWGEEYIYDLIGDVKFATISARSFYQVNPE  
 YfjO/ AIQKRLPEVKSIIQNVNGAKTSVIFGEKTKQLACKTVIQEVLGDVSFELSARAFFQLNPE

YefA/ QTKVLYDKALEYAELOGEETVIDAYCGTGTISLFLAKQAKKVYGVVEIVPEATEDAKRNAE  
 YfjO/ QTVKLYDEVKKAQLTGKEKVVDAYCGVGTIGMWVADGAKEVRGMDVIKESIDDAKKNK

YefA/ LNCNTNAEFVAGEAETVIPKWYEEGITADTLVVDPPRKGCD EALLRTIVEMKPKRVVYVS  
 YfjO/ KHGMANATYVTGTAEHWLPKWTKEGFRPDVVI VDPPTGCDSTFLDTIKKVKPKRFVYVS

YefA/ CNPGTLARDLRVLEDGGYVTREVQPVDMFPHTNHVECCVLIKKE--  
 YfjO/ CNPSTLAKDLQTL SK-DYRVDYIQPVDMFPQTAHVEAVARLVLKSSN

**Figure S3**

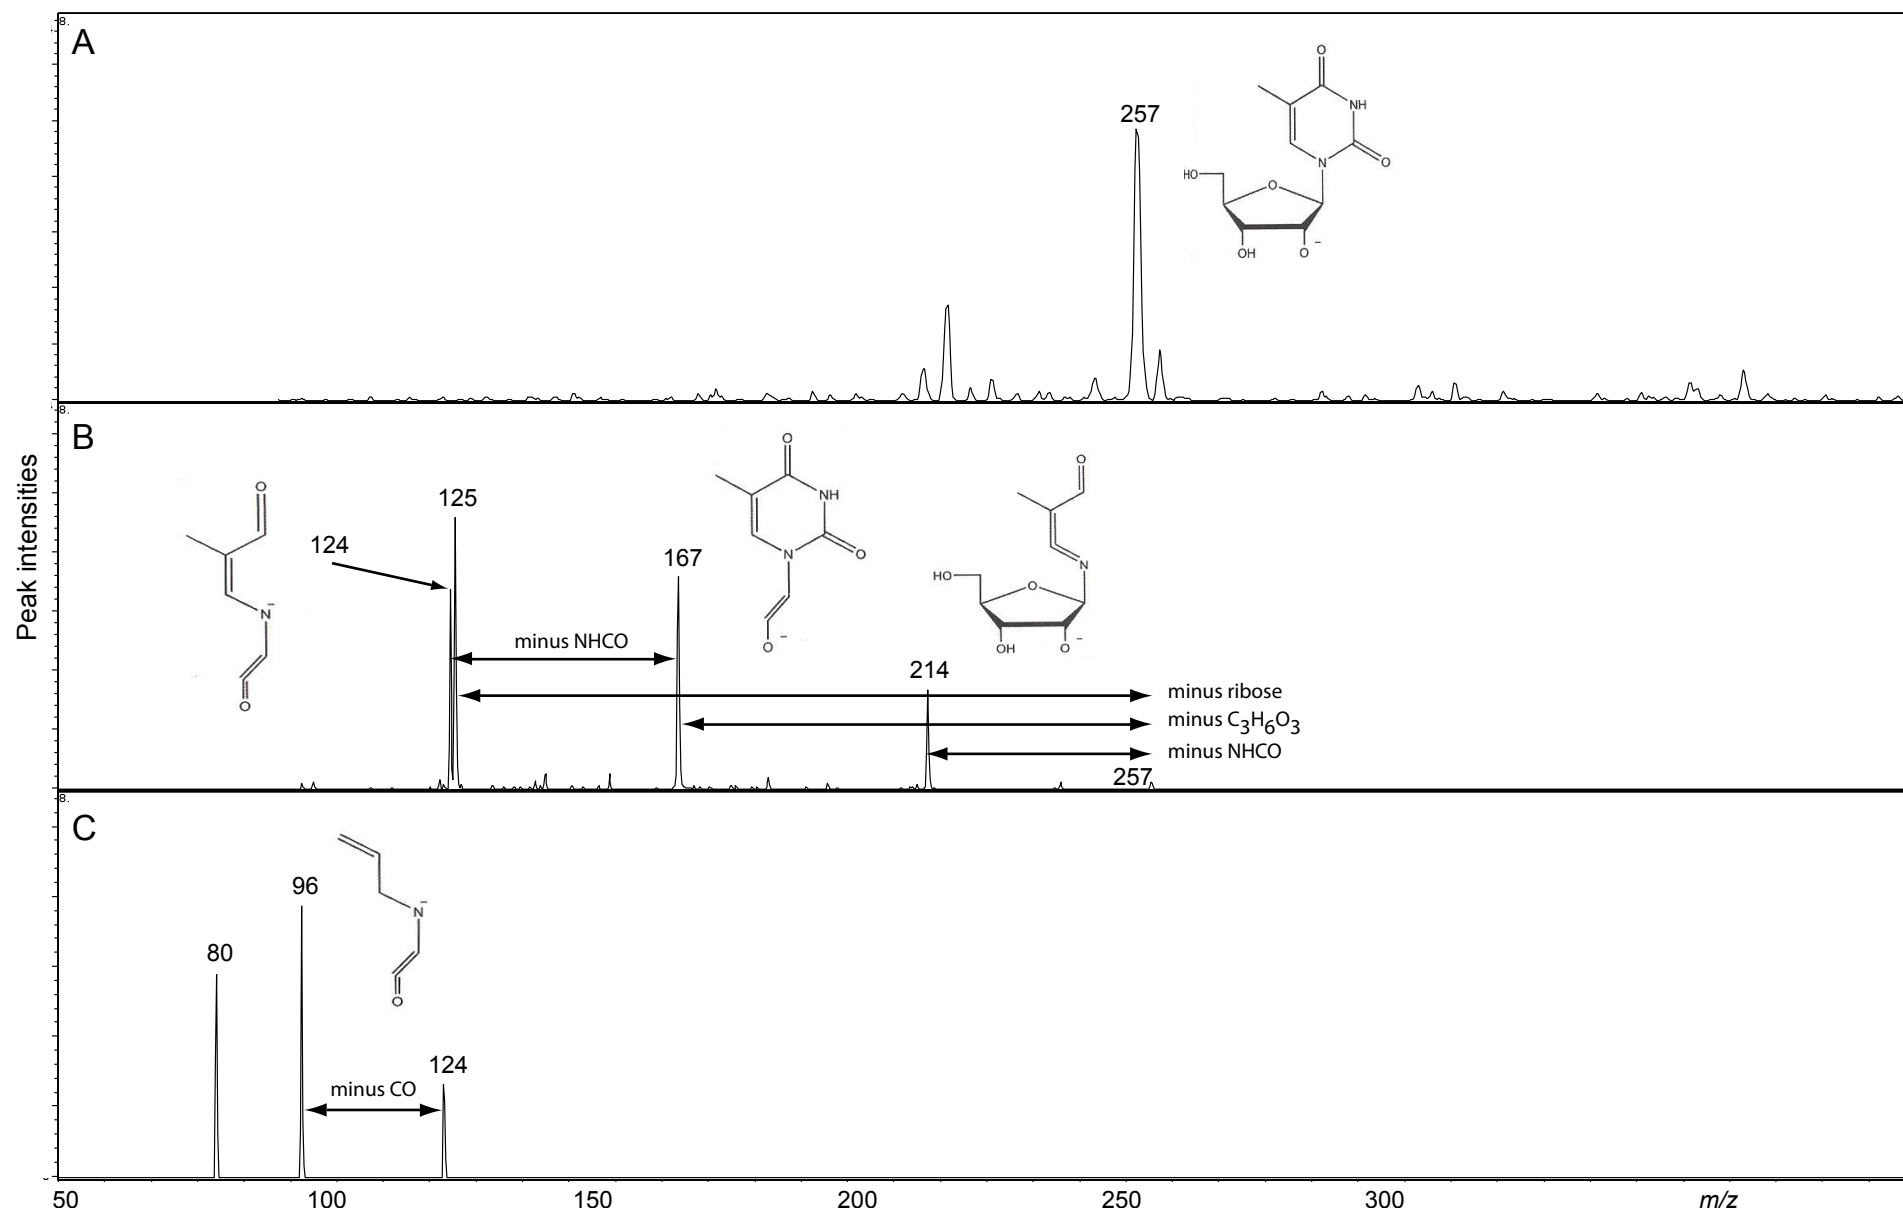

**Figure S4**

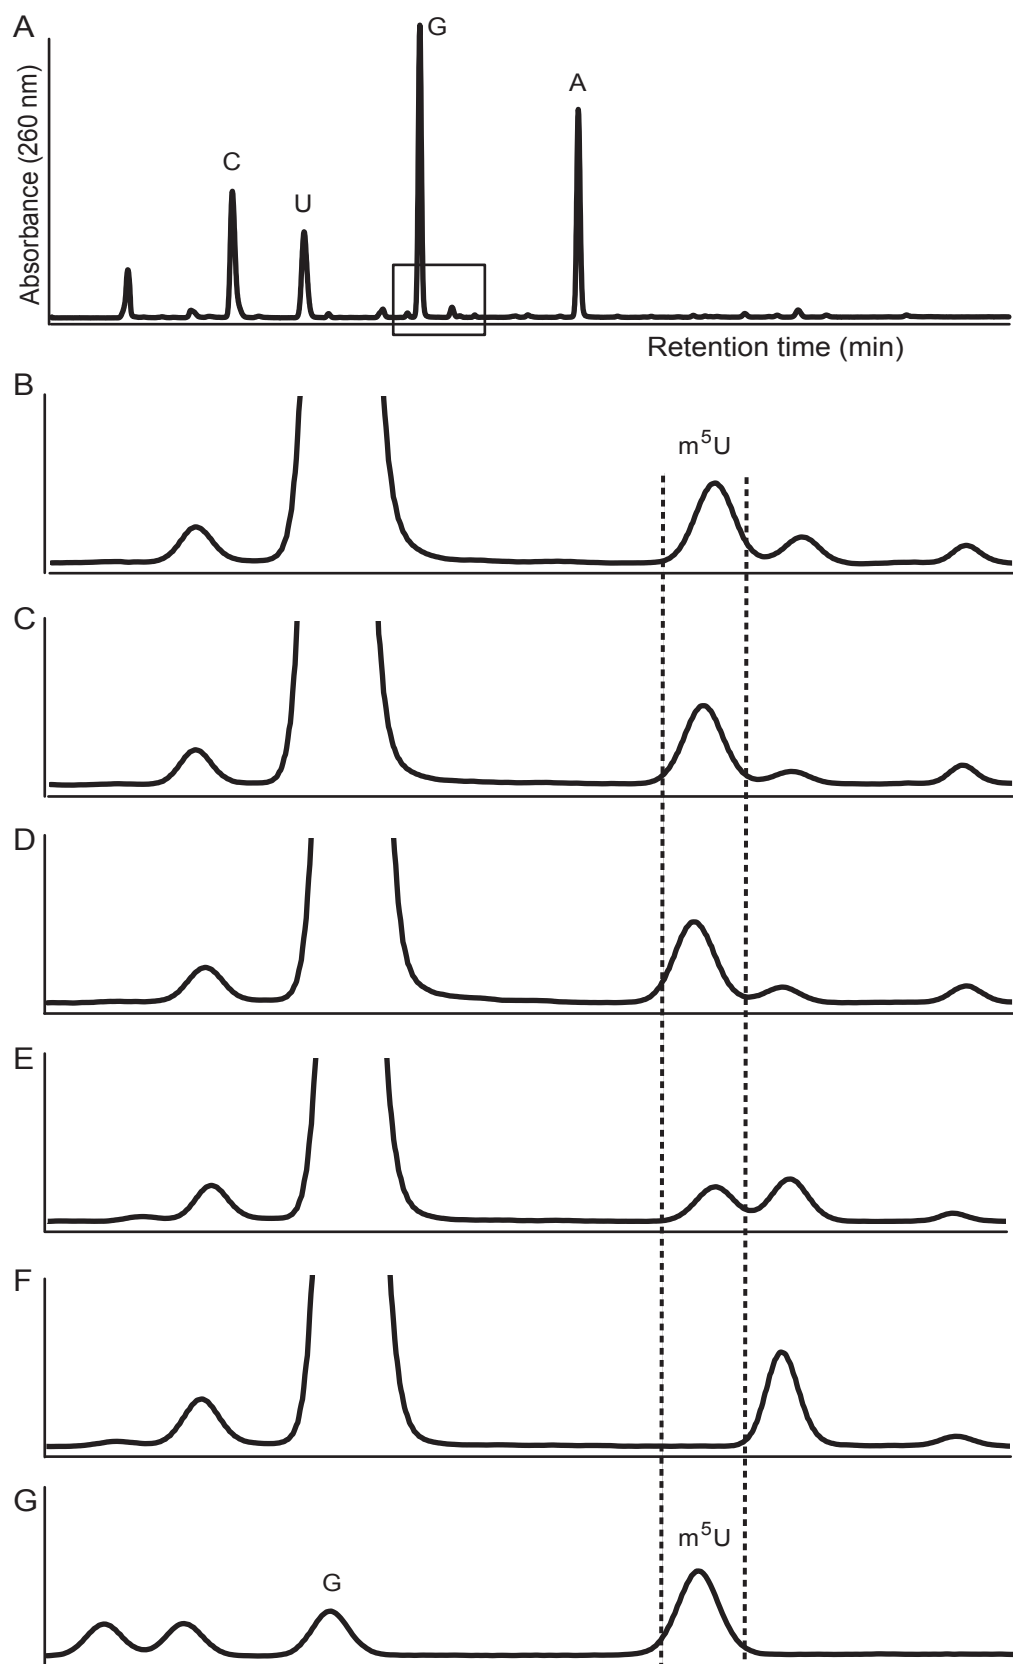

**Figure S5**
